# Supplementary material for: Origin of improved visible photocatalytic activity of nitrogen/hydrogen codoped cubic In2O3: first-principles calculations
Source: Royal Society of Chemistry journal article supplement (doi:10.1039/c0cp00521e), 2010-11-23
Supplement: c0cp00521e.pdf [file c0cp00521e.pdf]

## Supporting Information

### Origin of Improved Visible Photocatalytic Activity of Nitrogen/Hydrogen Codoped Cubic $\text{In}_2\text{O}_3$ : First Principles Calculation

Honggang Sun,<sup>a</sup> Weiliu Fan,<sup>b\*</sup> Yanlu Li,<sup>a</sup> Xiufeng Cheng,<sup>a</sup> Pan Li,<sup>a</sup> Jingcheng Hao,<sup>b</sup> and Xian Zhao<sup>a\*</sup>

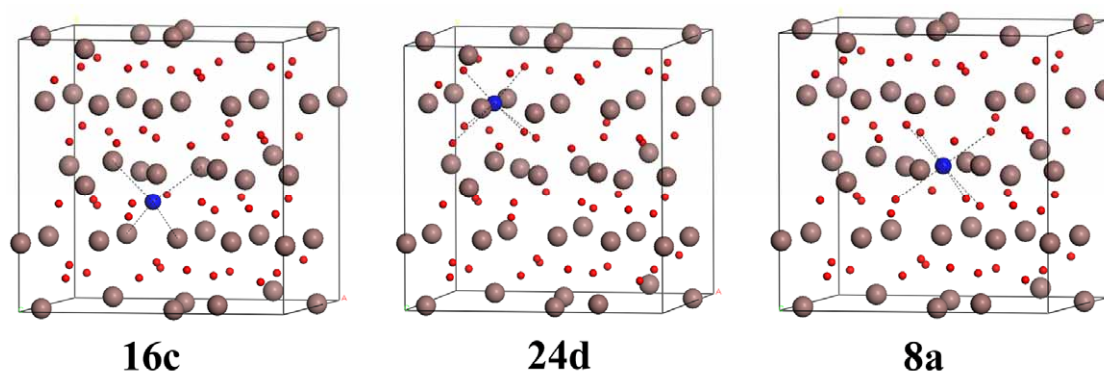

S1. The original interstitial N positions for 16c ( $1/8, 1/8, 1/8$ ), 24d ( $1/4, 0, 1/4$ ), 8a ( $1/2, 1/2, 0$ ).

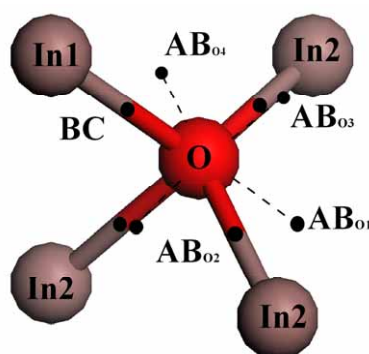

S2. The original interstitial N positions for bond center (BC) and anti-bond center (AB) of In-O bonds.
